# Supplementary material for: Structure–Activity Relationship of Antibody–Oligonucleotide Conjugates: Evaluating Bioconjugation Strategies for Antibody–Phosphorodiamidate Morpholino Oligomer Conjugates for Drug Development
Source: PubMed Central journal article supplement — J Med Chem. 2024 Aug 28;67(17):14868–84. doi: 10.1021/acs.jmedchem.4c00803 (PMC11403617; doi:10.1021/acs.jmedchem.4c00803), 2024-08-28
Supplement: jm4c00803_si_001.pdf [file jm4c00803_si_001.pdf]

## Supporting Information

### Structure–Activity Relationship of Antibody–Oligonucleotide Conjugates: Evaluating Bioconjugation Strategies for Antibody–Phosphorodiamidate Morpholino Oligomers Conjugates for Drug Development

#### Authors:

#### Authors:

Michael Cochran,<sup>†</sup> Isaac Marks,<sup>†</sup> Tyler Albin,<sup>†§</sup> Danny Arias,<sup>†</sup> Philip Kovach,<sup>†</sup> Beatrice Darimont,<sup>‡</sup> Hanhua Huang,<sup>†</sup> Usue Etxaniz,<sup>†</sup> Hae Won Kwon,<sup>†</sup> Yunyu Shi,<sup>†</sup> Matthew Diaz,<sup>†</sup> Olecy Tyaglo,<sup>†</sup> Arthur Levin,<sup>†</sup> and Venkata Ramana Doppalapudi<sup>†\*</sup>

\*Corresponding author

#### Affiliation at Time of Work Completion:

<sup>†</sup>Avidity Biosciences, Inc., 10578 Science Center Drive Suite 125. San Diego, CA 92121

<sup>‡</sup>CYTOO, 7 Parv. Louis Néel CS 20050, 38040 Grenoble, France

#### Corresponding Author:

Please address correspondence to Venkata Ramana Doppalapudi at [ramana@aviditybio.com](mailto:ramana@aviditybio.com).

#### Present/Current Author Addresses:

<sup>†</sup>Avidity Biosciences, Inc., 10578 Science Center Drive Suite 125. San Diego, CA 92121

<sup>‡</sup>CYTOO, 7 Parv. Louis Néel CS 20050, 38040 Grenoble, France

<sup>§</sup>Seawolf Therapeutics, One Sansome Street Suite 3630, San Francisco, CA 94104, USA

## Table of Contents

|                                                                                                                                                                                                                                          |     |
|------------------------------------------------------------------------------------------------------------------------------------------------------------------------------------------------------------------------------------------|-----|
| <b>Table S1.</b> PMO conjugate structures                                                                                                                                                                                                | S2  |
| <b>Table S2.</b> Primers used for exon-skipping analysis                                                                                                                                                                                 | S5  |
| <b>Figure S1.</b> Plasma clearance of targeted versus untargeted AOCs                                                                                                                                                                    | S6  |
| <b>Figure S2.</b> Characterization of an $\alpha$ hTfR1-MCC-pmo DAR8 AOC                                                                                                                                                                 | S7  |
| <b>Figure S3.</b> Measures of PMO concentration and exon skipping in heart                                                                                                                                                               | S10 |
| <b>Figure S4.</b> Reversed-phase high-performance liquid chromatography (RP-HPLC) analysis to measure pmoEx23 starting material purity (69.2% main peak area)                                                                            | S11 |
| <b>Figure S5.</b> Post-strong anion exchange chromatography purification of pmoEx23: 93.7% main peak purity                                                                                                                              | S12 |
| <b>Figure S6.</b> Electrospray ionization mass spectrum of pmoEx23 with 3' beta-alanine (a) before and (b) after addition of MCC linker. (c) RP-HPLC pmoEx23 with 3' beta-alanine before (bottom) and after (top) addition of MCC linker | S13 |
| <b>Figure S7.</b> Electrospray ionization mass spectrum of pmoEx23 (a) before and (b) after addition of MC linker. (c) RP-HPLC pmoEx23 before (top) and after (bottom) addition of MCC linker                                            | S15 |
| <b>Figure S8.</b> Characterization of $\alpha$ mTfR1-MCC-pmoEx23 DAR4 AOC                                                                                                                                                                | S17 |
| <b>Figure S9.</b> Characterization of $\alpha$ mTfR1-MCC-pmoEx23 DAR6 AOC                                                                                                                                                                | S21 |
| <b>Figure S10.</b> Characterization of $\alpha$ mTfR1-MCC-pmoEx23 DAR10 AOC                                                                                                                                                              | S25 |

**Table S1.** PMO conjugate structures.

|                                       |        |                                                    | Reagent added to reaction mixture (molar equivalent relative to mAb) |      | Purity by SEC (%) |      |          |                                       |     | Dose               |                      |
|---------------------------------------|--------|----------------------------------------------------|----------------------------------------------------------------------|------|-------------------|------|----------|---------------------------------------|-----|--------------------|----------------------|
| Conjugate                             | Linker | Sequence                                           | TCEP                                                                 | PMO  | Monomer           | HMWS | DAR0 (%) | Unconjugated PMO / Conjugated PMO (%) | DAR | PMO (mg/kg)        | mAb (mg/kg)          |
| αmTfR1-MCC-pmoEx23 3' DAR3.6 (Fig 2)  | MCC    | GGCCAAA<br>CCTCGGC<br>TTACCTGA<br>AAT(3'β-Alanine) | 6                                                                    | 2.75 | 94                | 6    | 0        | 3                                     | 3.6 | 10.2<br>5.1<br>2.5 | 50.0<br>25.0<br>12.5 |
| αmTfR1-MCC-pmoEx23 5' DAR3.7 (Fig 2)  | MCC    | (5'Amine)G<br>GCCAAAC<br>CTCGGCTT<br>ACCTGAAAT     | 6                                                                    | 2.75 | 97                | 3    | 0        | 6                                     | 3.7 | 10.5<br>5.2<br>2.6 | 50.0<br>25.0<br>12.5 |
| αmTfR1-PEG2-pmoEx23 3' DAR3.9 (Fig 2) | PEG2   | GGCCAAA<br>CCTCGGC<br>TTACCTGA<br>AAT              | 6                                                                    | 2.75 | 93                | 7    | 0        | 1                                     | 3.9 | 11.0<br>5.5<br>2.8 | 50.0<br>25.0<br>12.5 |
| αmTfR1-MCC-SCRAM DAR3.4 (Fig 2)       | MCC    | CGGTGTG<br>TGTATCAT<br>TCTCTAGT<br>GT(3'β-Alanine) | 6                                                                    | 3.5  | 93                | 7    | 0.1      | 1                                     | 3.4 | 9.6<br>4.8<br>2.4  | 50.0<br>25.0<br>12.5 |
| αmTfR1-MCC-pmoEx23 DAR4.1 (Fig 3)     | MCC    | GGCCAAA<br>CCTCGGC<br>TTACCTGA<br>AAT(3'β-Alanine) | 6                                                                    | 3.5  | 92                | 8    | 0        | 5                                     | 4.1 | 11.6               | 50.0                 |
| αmTfR1-ValCit-pmoEx23 DAR4.2 (Fig 3)  | ValCit | GGCCAAA<br>CCTCGGC<br>TTACCTGA<br>AAT(3'β-Alanine) | 6                                                                    | 3.5  | 95                | 5    | 0        | 3                                     | 4.2 | 11.9               | 50.0                 |
| αmTfR1-BisMal-pmoEx23 DAR3.6 (Fig 3)  | BisMal | GGCCAAA<br>CCTCGGC<br>TTACCTGA<br>AAT(3'β-Alanine) | 6                                                                    | 3.15 | 91                | 9    | 0        | 3                                     | 3.6 | 10.2               | 50.0                 |
| αmTfR1-MCC-pmoEx23 DAR1 (Fig 4a)      | MCC    | GGCCAAA<br>CCTCGGC<br>TTACCTGA<br>AAT(3'β-Alanine) | 6                                                                    | 3.15 | 98                | 2    | 2.1      | 2                                     | 1.0 |                    |                      |

|                                             |     |                                                        |     |      |    |   |     |     |     |                    |                      |
|---------------------------------------------|-----|--------------------------------------------------------|-----|------|----|---|-----|-----|-----|--------------------|----------------------|
| amTfR1-MCC-<br>pmoEx23 DAR2 (Fig<br>4)      | MCC | GGCCAAA<br>CCTCGGC<br>TTACCTGA<br>AAT(3'β-<br>Alanine) | 6   | 3.15 | 96 | 4 | 0.7 | 4   | 2.0 | 5.7<br>1.9         | 50.0<br>16.7         |
| amTfR1-MCC-<br>pmoEx23 DAR3 (Fig<br>4)      | MCC | GGCCAAA<br>CCTCGGC<br>TTACCTGA<br>AAT(3'β-<br>Alanine) | 6   | 3.15 | 98 | 2 | 0.3 | 3   | 3.0 | 8.5<br>5.7<br>2.8  | 50.0<br>33.4<br>16.7 |
| amTfR1-MCC-<br>pmoEx23 DAR4 (Fig<br>4)      | MCC | GGCCAAA<br>CCTCGGC<br>TTACCTGA<br>AAT(3'β-<br>Alanine) | 6   | 3    | 99 | 1 | 0.3 | 1   | 4.0 | 11.3<br>3.8<br>5.7 | 50.0<br>28.8<br>16.7 |
| amTfR1-MCC-<br>pmoEx23 DAR5.5<br>(Fig 4)    | MCC | GGCCAAA<br>CCTCGGC<br>TTACCTGA<br>AAT(3'β-<br>Alanine) | 6   | 2.75 | 97 | 3 | 0.8 | 1   | 5.5 | 15.6<br>5.7        | 50.0<br>18.2         |
| amTfR1-MCC-<br>pmoEx23 DAR3.9(Fig<br>4)     | MCC | GGCCAAA<br>CCTCGGC<br>TTACCTGA<br>AAT(3'β-<br>Alanine) | 6   | 3    | 98 | 2 | 0.2 | 3   | 3.9 | 11.0<br>6.4<br>3.7 | 50.0<br>28.8<br>16.7 |
| Control.mAb-MCC-<br>PMOEx23<br>DAR3.9(Fig4) | MCC | GGCCAAA<br>CCTCGGC<br>TTACCTGA<br>AAT(3'β-<br>Alanine) | 6   | 2.75 | 97 | 3 | 0   | 3   | 3.9 | 11.0               | 50.0                 |
| amTfR1-MCC-<br>pmoEx23 DAR4 (Fig<br>5)      | MCC | GGCCAAA<br>CCTCGGC<br>TTACCTGA<br>AAT(3'β-<br>Alanine) | 2.2 | 5.2  | 97 | 3 | 7.6 | <1% | 3.9 | 10.0               | 45.9                 |
| amTfR1-MCC-<br>pmoEx23 DAR7 (Fig<br>5)      | MCC | GGCCAAA<br>CCTCGGC<br>TTACCTGA<br>AAT(3'β-<br>Alanine) | 5   | 10   | 93 | 6 | 0.2 | <1% | 7.0 | 18.3               | 45.9                 |
| amTfR1-MCC-<br>pmoEx23 DAR4 (Fig<br>6)      | MCC | GGCCAAA<br>CCTCGGC<br>TTACCTGA<br>AAT(3'β-<br>Alanine) | 2.3 | 8.2  | 95 | 5 | 8.5 | <1% | 3.9 | 10.0               | 44.2                 |
| amTfR1-MCC-<br>pmoEx23 DAR10 (Fig<br>6)     | MCC | GGCCAAA<br>CCTCGGC<br>TTACCTGA<br>AAT(3'β-<br>Alanine) | 8   | 13.2 | 95 | 5 | 0   | <1% | 9.7 | 10.0               | 22.1                 |
| amTfR1-MC-<br>pmoEx23 DAR4 (Fig<br>6)       | MC  | GGCCAAA<br>CCTCGGC<br>TTACCTGA<br>AAT(3'β-<br>Alanine) | 2.3 | 7    | 94 | 6 | 8.5 | <1% | 3.9 | 10.0               | 44.2                 |
| amTfR1-MC-<br>pmoEx23 DAR6 (Fig<br>6)       | MC  | GGCCAAA<br>CCTCGGC<br>TTACCTGA<br>AAT(3'β-<br>Alanine) | 3.5 | 8.5  | 95 | 5 | 2.9 | <1% | 5.8 | 10.0               | 29.5                 |

|                                                  |     |                                                                |     |    |    |   |     |     |     |      |      |
|--------------------------------------------------|-----|----------------------------------------------------------------|-----|----|----|---|-----|-----|-----|------|------|
| $\alpha$ mTfR1-MC-<br>pmoEx23 DAR10 (Fig<br>6)   | MC  | GGCCAAA<br>CCTCGGC<br>TTACCTGA<br>AAT(3' $\beta$ -<br>Alanine) | 8   | 11 | 92 | 8 | 1.6 | <1% | 9.7 | 10.0 | 22.1 |
| $\alpha$ mTfR1-MCC-<br>pmoEx23 DAR4 (Fig<br>7/8) | MCC | GGCCAAA<br>CCTCGGC<br>TTACCTGA<br>AAT(3' $\beta$ -<br>Alanine) | 2.3 | 5  | 96 | 4 | 3.7 | <1% | 4.4 | 10.0 | 44.2 |

Abbreviations:  $\alpha$ mTfR1, anti-mouse transferrin receptor 1 antibody; BisMal, bismaleimide; DAR, drug-to-antibody ratio; mAb, monoclonal antibody; MC, maleimidocaproyl; MCC, 4-(N-maleimidomethyl) cyclohexane-1-carboxylate; pmoEx23, PMO targeting mouse exon 23; SEC, size exclusion chromatography.

**Table S2.** Primers used for exon-skipping analysis.

| Target                         | Species | Primer/probe or commercial TaqMan assay ID | Sequence (5'-3')           |
|--------------------------------|---------|--------------------------------------------|----------------------------|
| <b>Exon 23 skipped Dmd</b>     | Mouse   | Fwd primer                                 | GCGCTATCAGGAGACAATGAG      |
|                                |         | Rev primer                                 | GTTTTTATGTGATTCTGTAATTTCCC |
|                                |         | Probe                                      | CTCTCTGTACCTTATCTTAGTGTT   |
| <b>Exon 23 non-skipped Dmd</b> | Mouse   | Fwd primer                                 | TGGAGGAGAGACTCGGGAAA       |
|                                |         | Rev primer                                 | TTGAAGCCATTTTGTTGCTCTTT    |
|                                |         | Probe                                      | ACAGGCTCTGCAAAGT           |
| <b>Total Dmd</b>               | Mouse   | TaqMan assay ID: Mm01216925_m1             |                            |
| <b>Ppib</b>                    | Mouse   | TaqMan assay ID: - Mm00478295_m1           |                            |

Abbreviations: Dmd, dystrophin; DMD, Duchenne muscular dystrophy; Fwd, forward; ID, identifier;

Ppib, peptidylprolyl isomerase B; Rev, reverse.

### Plasma clearance of targeted versus untargeted AOC

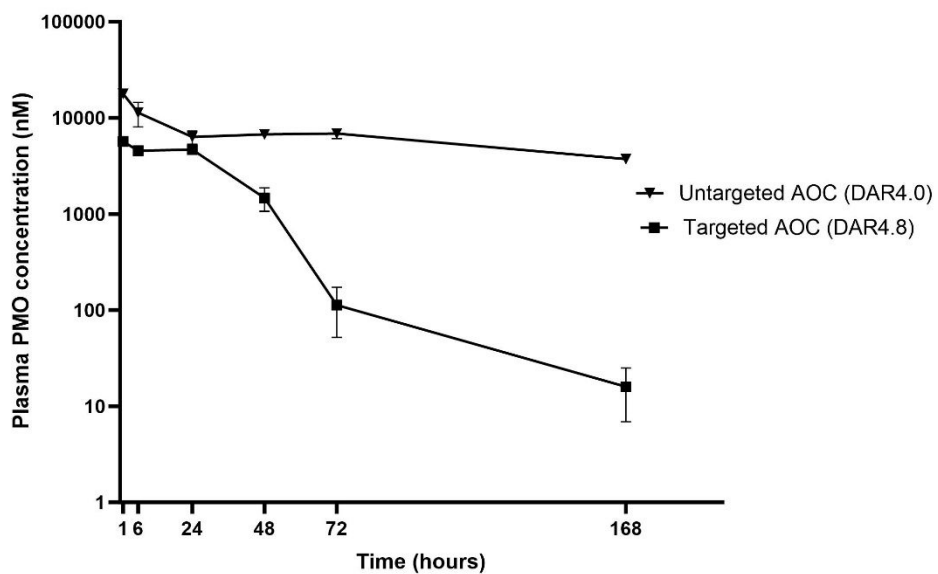

**Figure S1.** Plasma clearance of targeted versus untargeted AOCs. AOC, antibody–oligonucleotide conjugate; DAR, drug-to-antibody ratio; PMO, phosphorodiamidate morpholino oligomer.

a.

## Reduced capillary gel electrophoresis

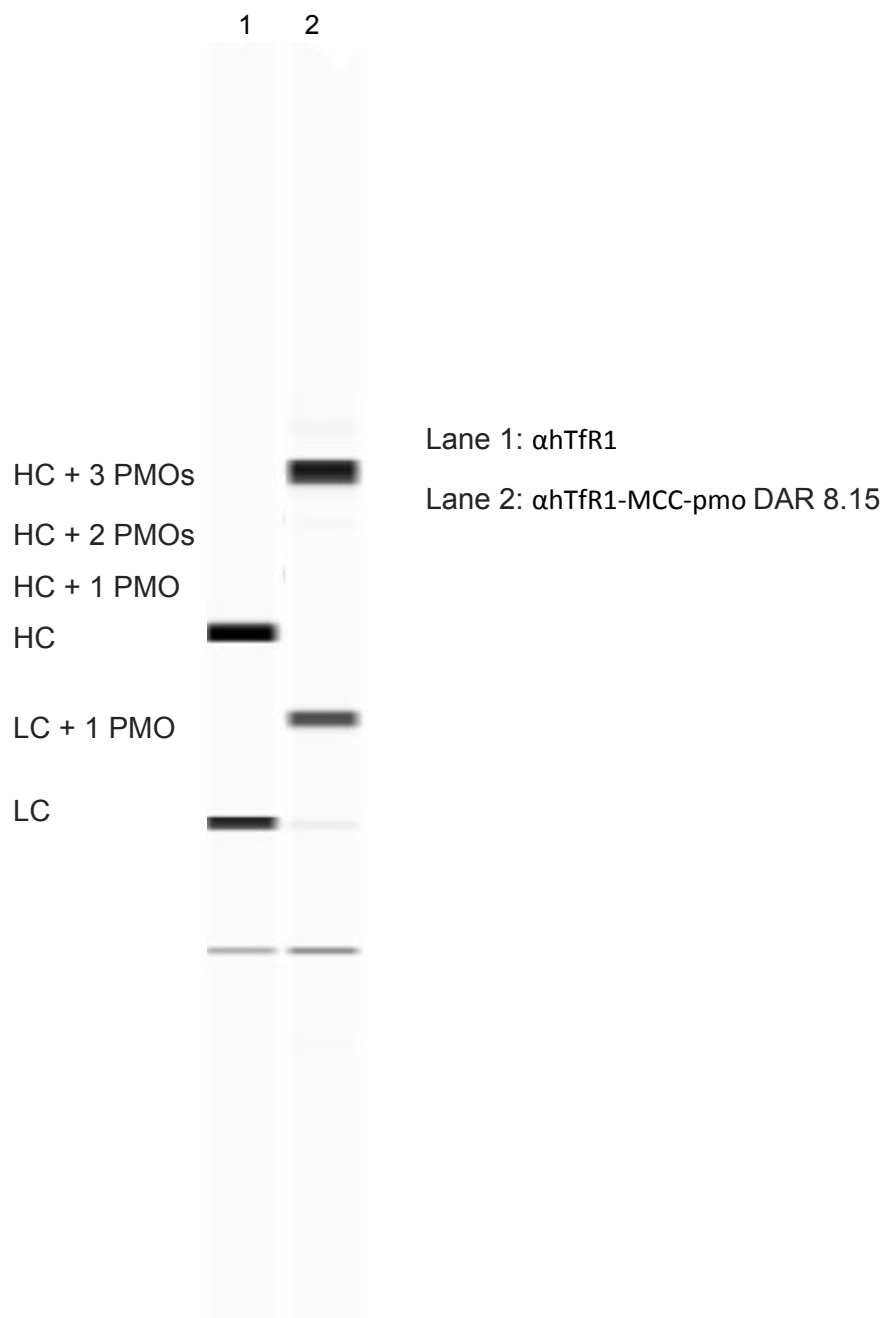



b.

## Reduced capillary gel electrophoresis

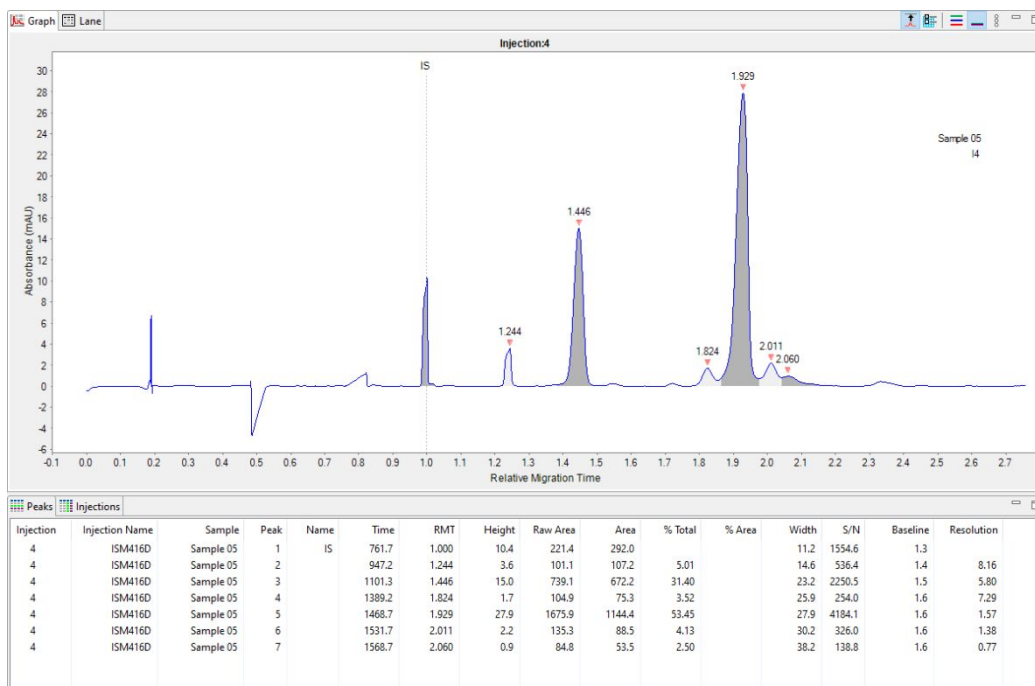

| Peak | Name                 | Area          | Area %                              | Weighted Area |
|------|----------------------|---------------|-------------------------------------|---------------|
| 1    | IS                   | 292           |                                     |               |
| 2    | LC                   | 107           | 0.14                                | 0.00          |
| 3    | LC+1                 | 672.2         | 0.86                                | 0.86          |
|      | <b>Total LC Area</b> | <b>779.2</b>  |                                     |               |
| 4    | HC                   | 0             | 0.00                                | 0.00          |
| 5    | HC+1                 | 0             | 0.00                                | 0.00          |
| 6    | HC+2                 | 75.3          | 0.06                                | 0.12          |
| 7    | HC+3                 | 1144.4        | 0.87                                | 2.62          |
| 8    | HC+4                 | 88.5          | 0.07                                | 0.27          |
| 8    | HC+5                 | 53.5          | 0.04                                | 0.20          |
|      | <b>Total HC Area</b> | <b>1308.2</b> |                                     | <b>3.21</b>   |
|      |                      |               | <b>(LC+HC) Weighted Area</b>        | <b>4.08</b>   |
|      |                      |               | <b>DAR= 2*(LC+HC) Weighted Area</b> | <b>8.15</b>   |

c.

### Analytical HIC (FLD)

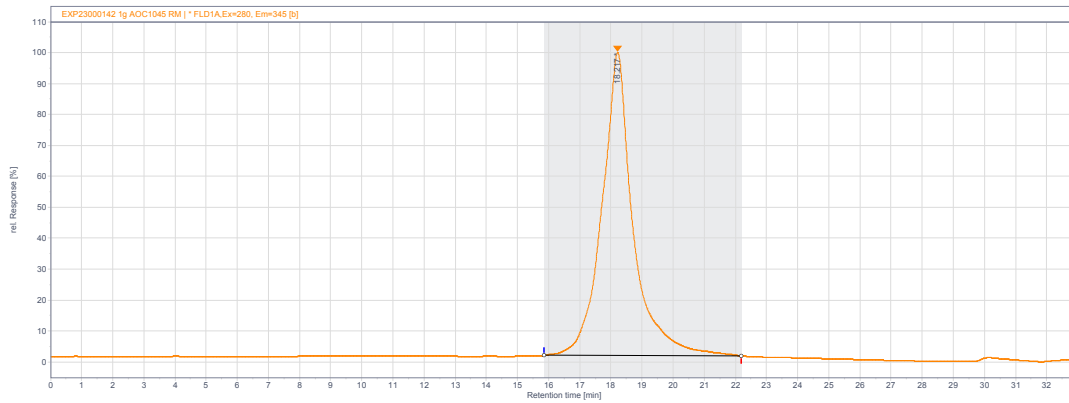

d.

### Analytical SEC (220 nM)

2.9% HMW

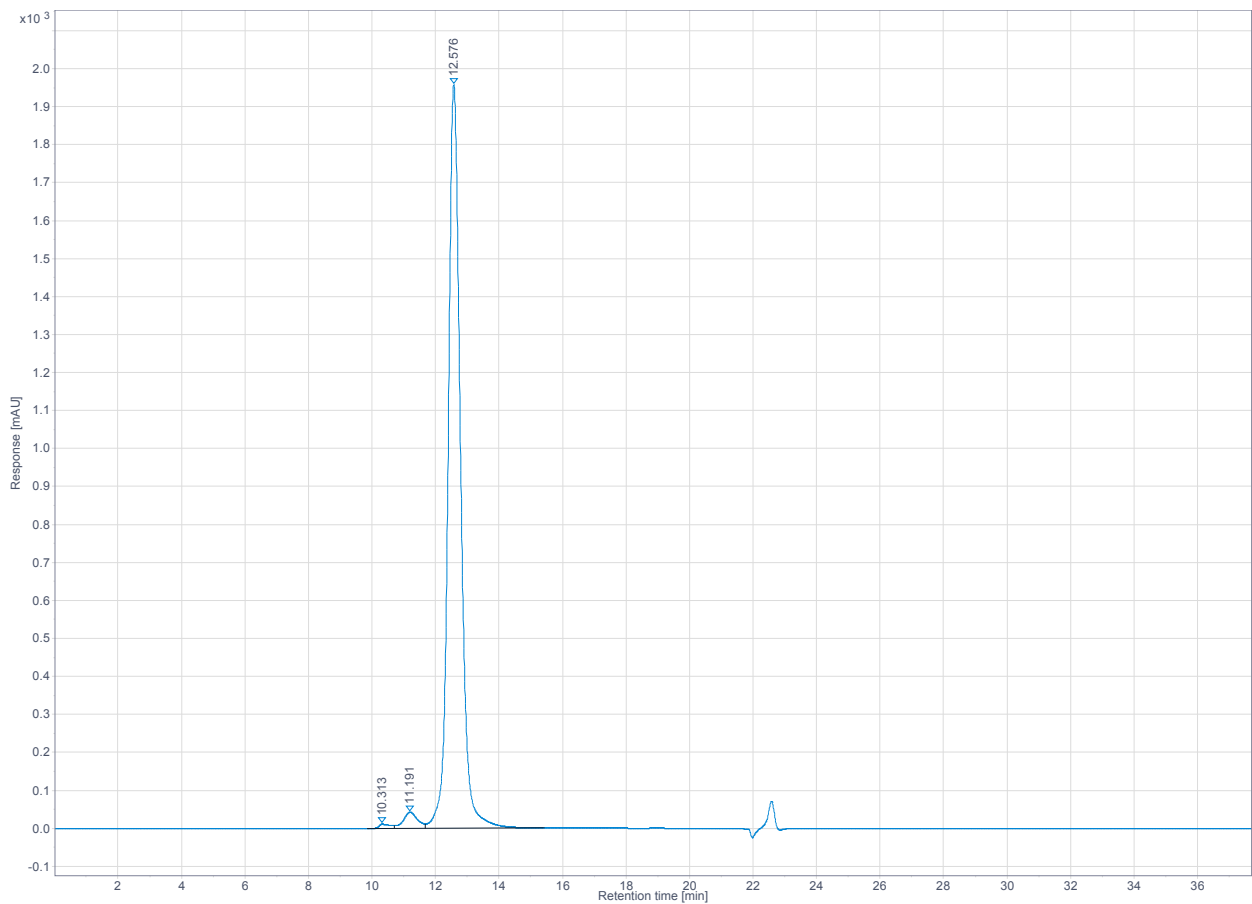

**Figure S2.** Characterization of an (a) Lane view of reduced capillary gel electrophoresis and (b) electrophoretogram of reduced capillary gel electrophoresis with the weighted average calculating the average DAR to be 8.15, (c) Hydrophobic interaction chromatography showing the AOC as a single peak and (d) size exclusion chromatography for an  $\alpha$ hTfR1-MCC-pmo DAR8 AOC (TCEP reduction at 4 eq. TCEP, PMO:mAb equivalents 9.75). AOC, antibody–oligonucleotide conjugate; DAR, drug-to-antibody ratio; eq, equivalents; FLD, fluorescence detector; HIC, hydrophobic interaction chromatography; HMW, high molecular weight species; LU, luminescence units; mAU, milli-absorbance units; MCC, 4-(N-maleimidomethyl) cyclohexane-1-carboxylate; SEC, size exclusion chromatography; TCEP, tris(2-carboxyethyl)phosphine.

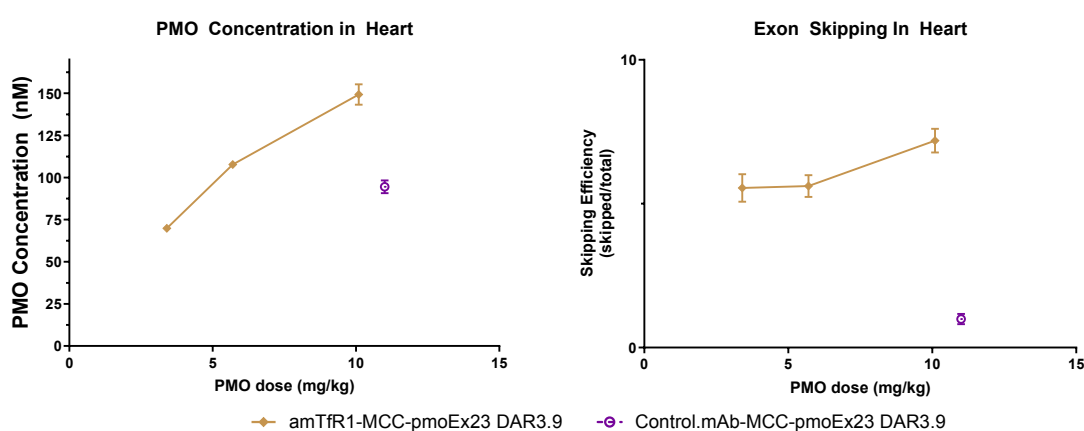

**Figure S3.** High concentrations of PMO measured in heart after treating mice with non-targeting mAb PMO-AOC however only TfR1 mediated uptake of PMO results in exon skipping.

DAR, drug-to-antibody ratio; mAb, monoclonal antibody; MCC, 4-(N-maleimidomethyl) cyclohexane-1-carboxylate; PMO, phosphorodiamidate morpholino oligomer; pmoEx23, PMO targeting mouse exon 23.

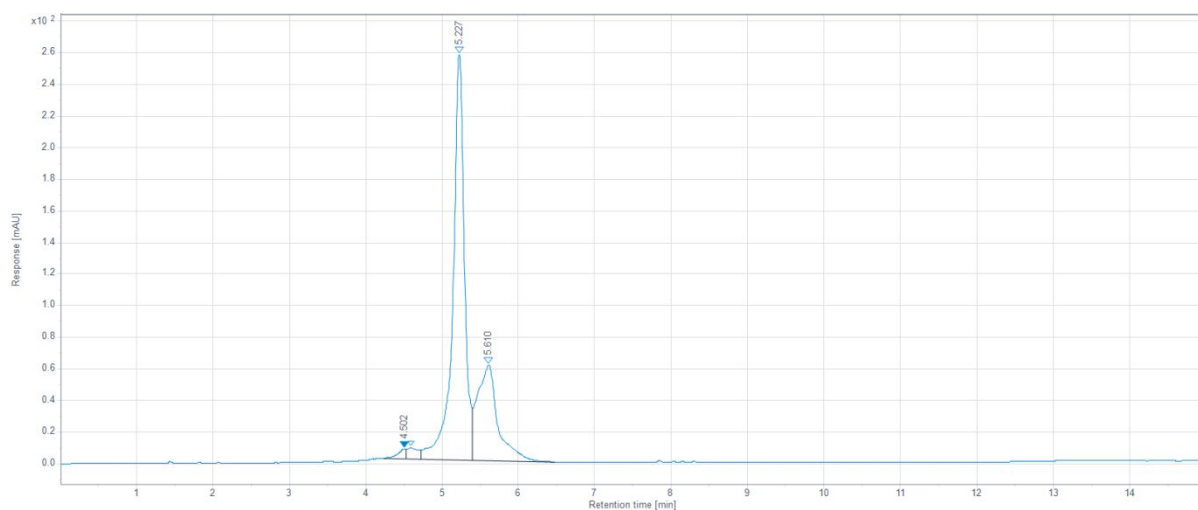

**Figure S4.** Reversed-phase high-performance liquid chromatography (RP-HPLC) analysis to measure pmoEx23 starting material purity (69.2% main peak area). mAU, milli-absorbance units; PMO, phosphorodiamidate morpholino oligomer; pmoEx23, PMO targeting mouse exon 23.

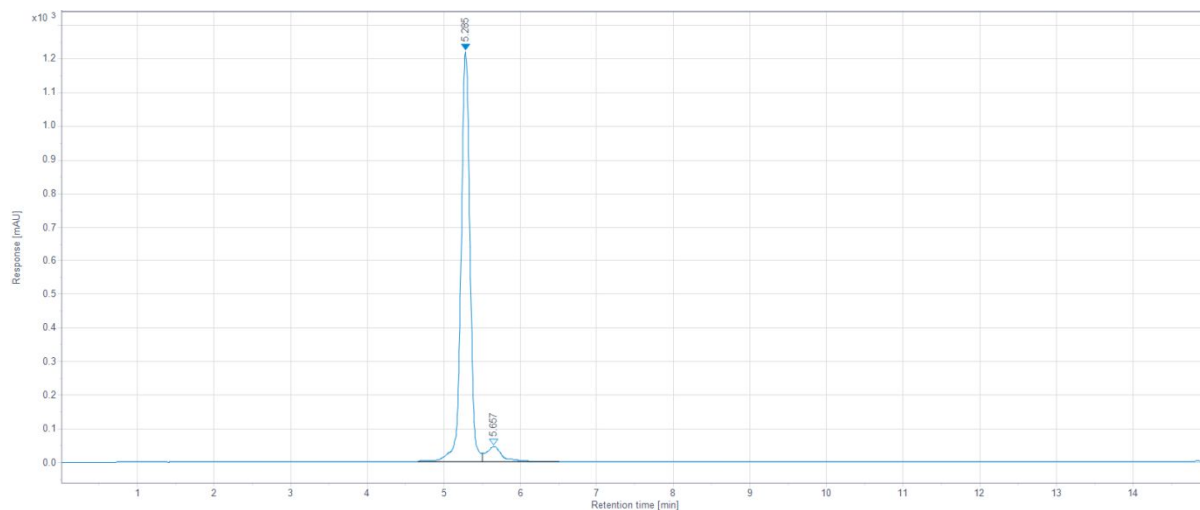

**Figure S5.** Post-strong anion exchange chromatography purification of pmoEx23: 93.7% main peak purity. mAU, milli-absorbance units; PMO, phosphorodiamidate morpholino oligomer; pmoEx23, PMO targeting mouse exon 23.

a.

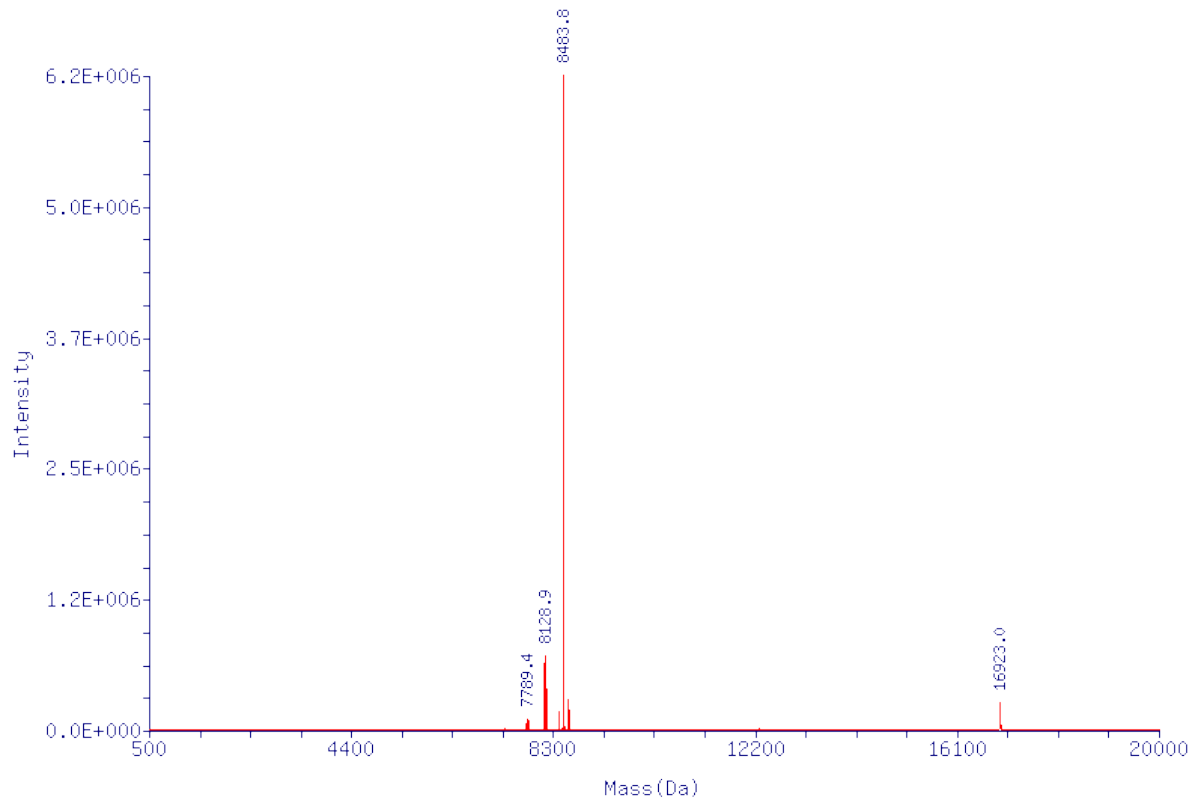

b.

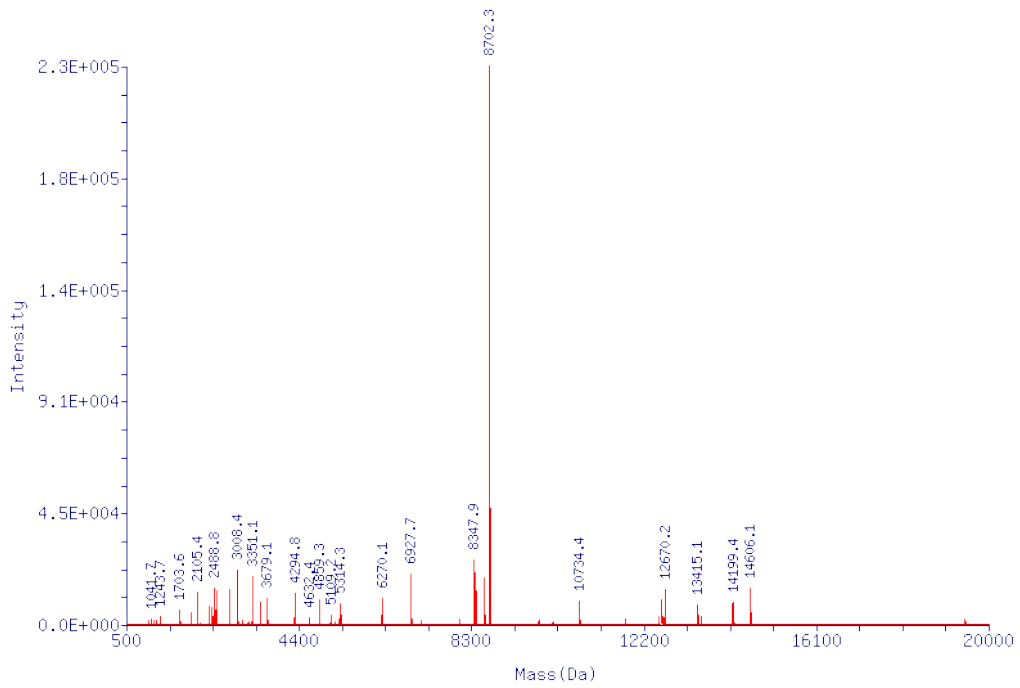

C.

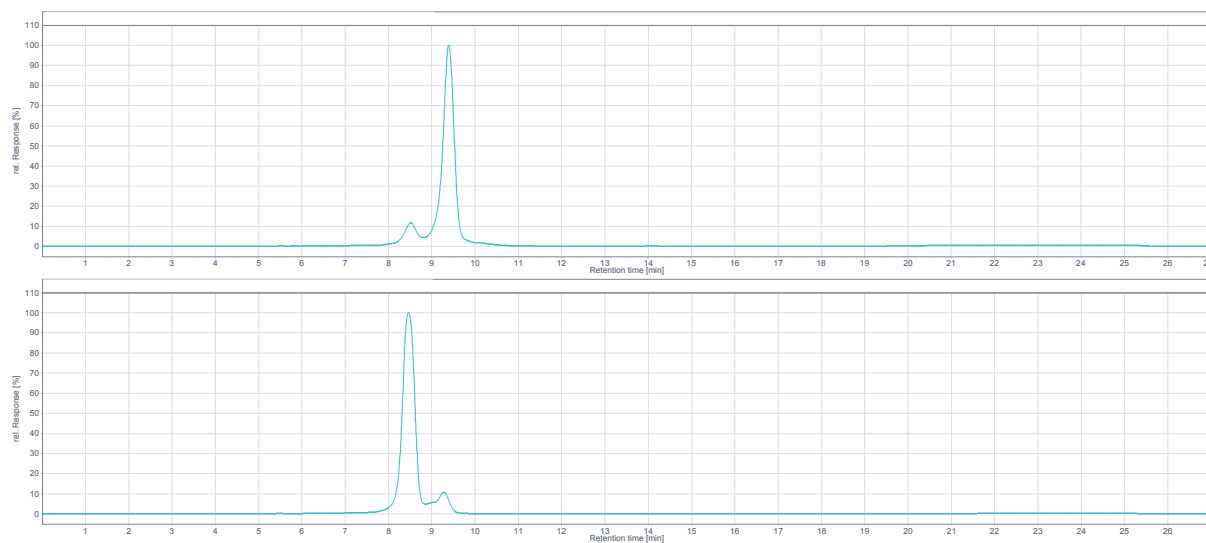

**Figure S6.** Electrospray ionization mass spectrum of pmoEx23 with 3' beta-alanine (a) before and (b) after addition of MCC linker. (c) RP-HPLC pmoEx23 with 3' beta-alanine before (bottom) and after (top) addition of MCC linker. MCC, 4-(N-maleimidomethyl) cyclohexane-1-carboxylate; mEx23, mouse Exon23; pmoEx23, PMO targeting mouse exon 23; rel, relative; RP-HPLC, reverse-phase high-performance liquid chromatography.

a.

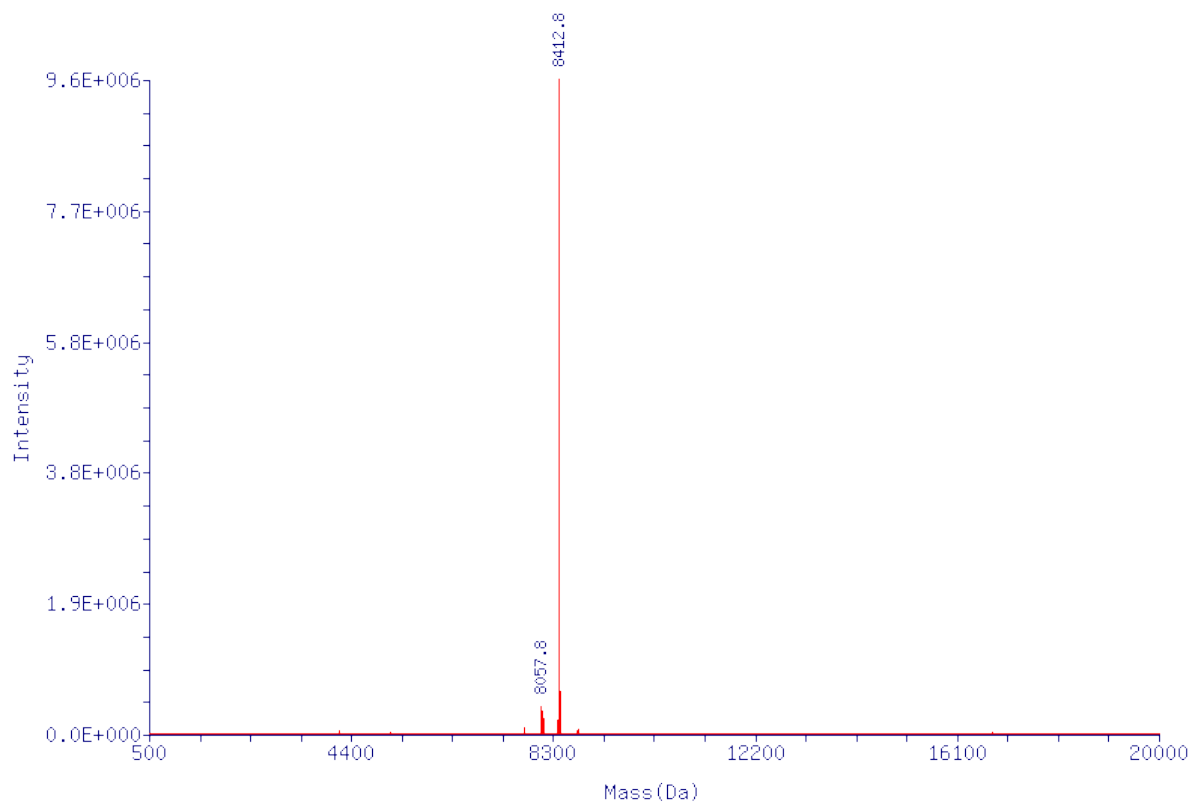



**b.**

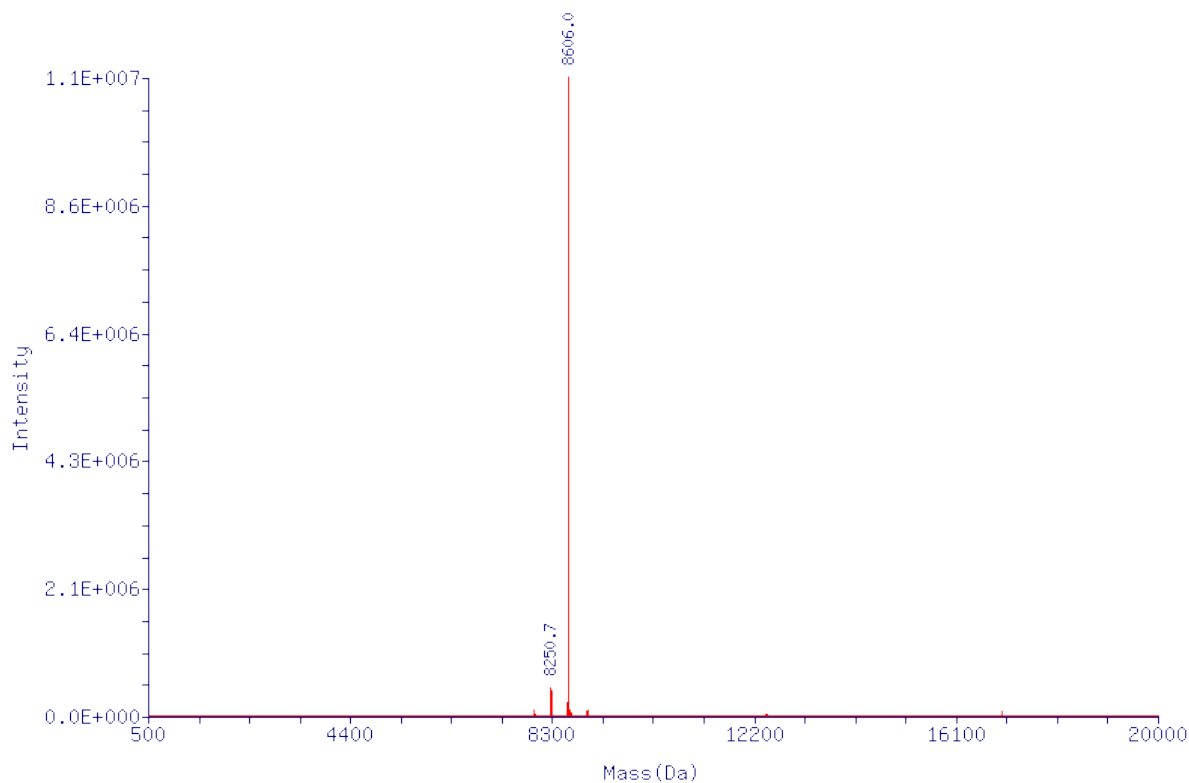

**c.**

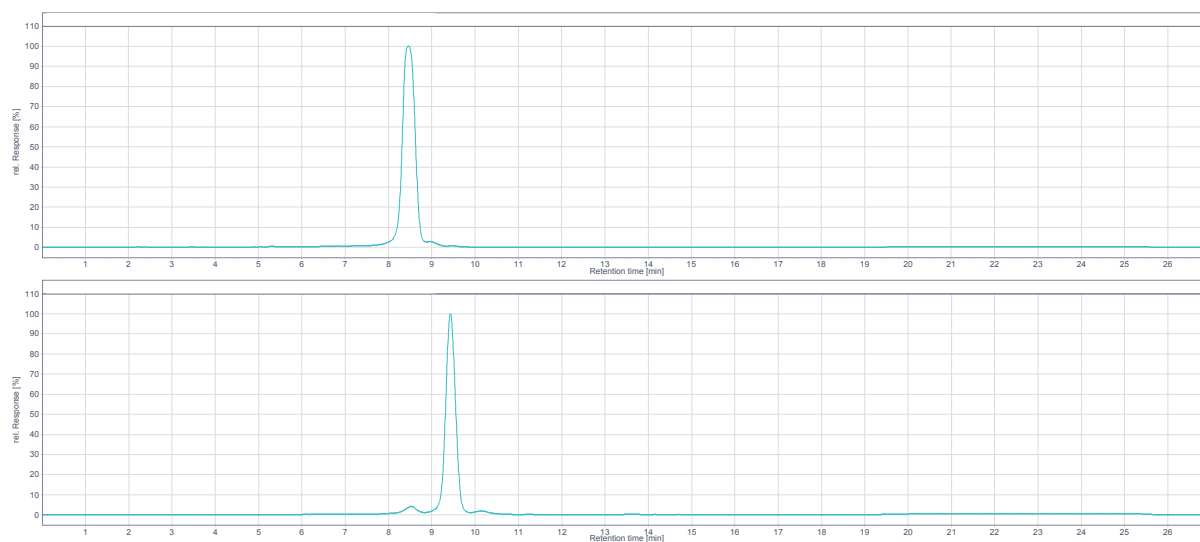

**Figure S7.** Electrospray ionization mass spectrum of pmoEx23 without 3' beta-alanine (a) before and (b) after addition of MCC linker. (c) RP-HPLC pmoEx23 before (top) and after (bottom) addition of MCC linker. ESI, electrospray ionization; MC, maleimidocaproyl; MCC, 4-(N-maleimidomethyl) cyclohexane-1-carboxylate; PMO, phosphorodiamidate morpholino oligomer; pmoEx23, PMO targeting mouse exon 23; rel, relative; RP-HPLC, RP-HPLC, reverse-phase high-performance liquid chromatography.

a.

## Reduced capillary gel electrophoresis

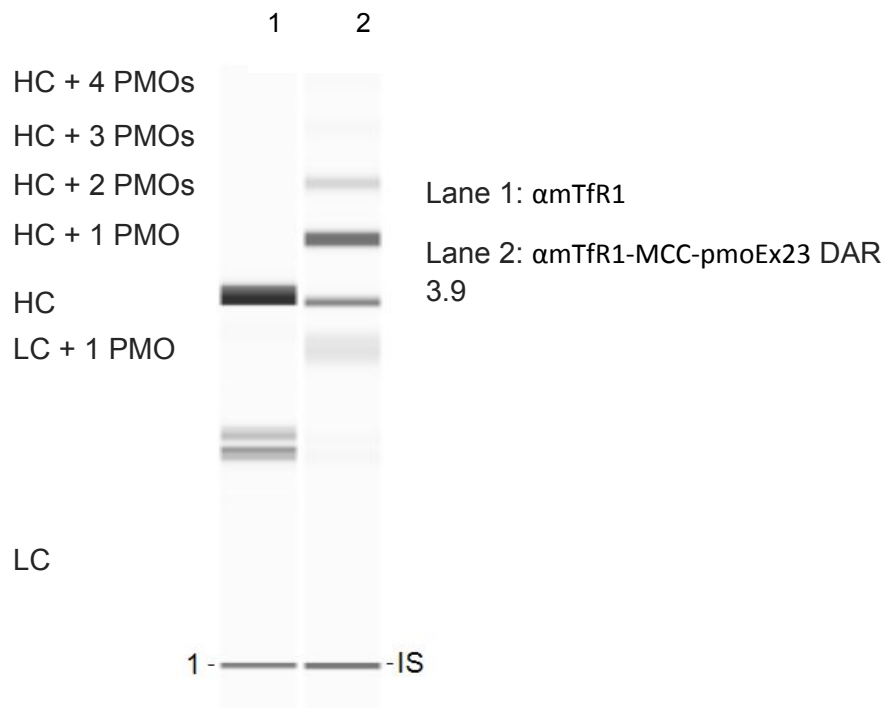

b.

## Reduced capillary gel electrophoresis

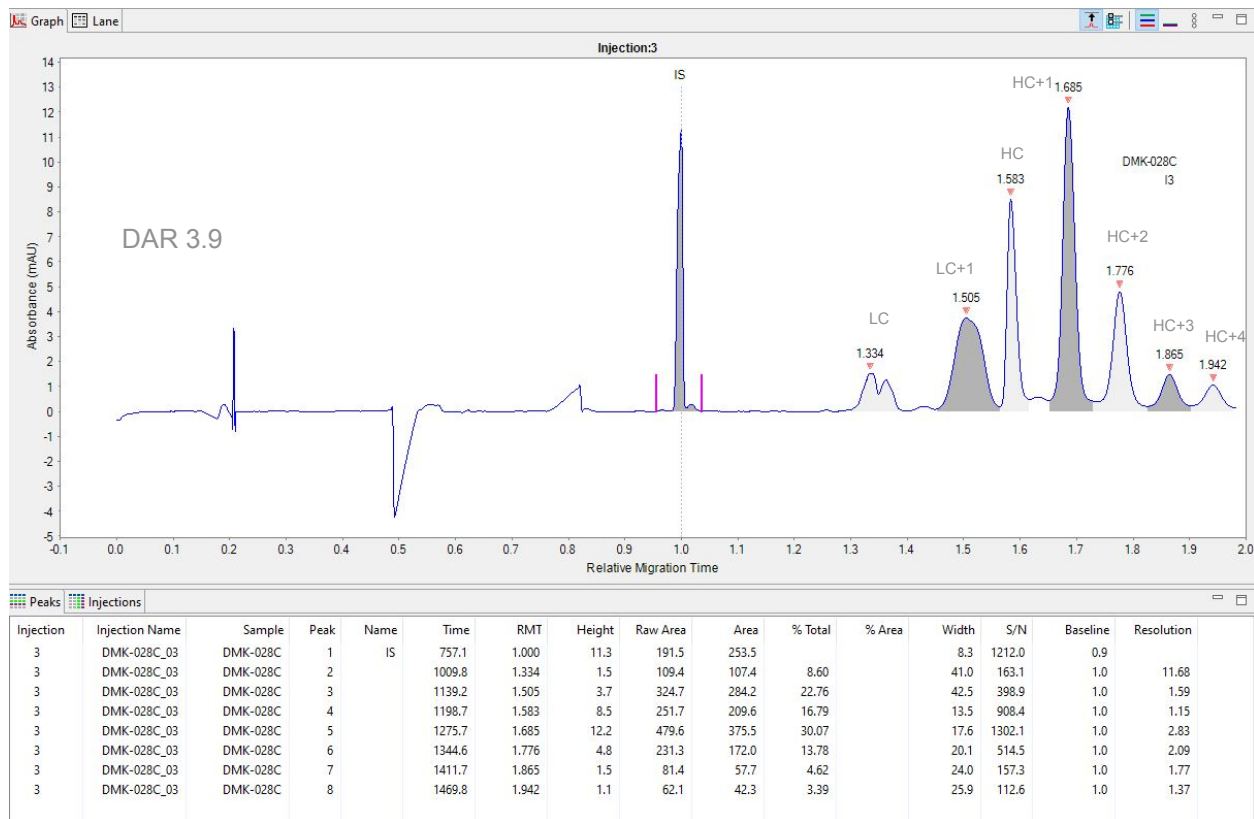

| Peak | Name                 | Area         | Area %                              | Weighted Area |
|------|----------------------|--------------|-------------------------------------|---------------|
| 1    | IS                   | 253.5        |                                     |               |
| 2    | LC                   | 107.4        | 0.27                                | 0.00          |
| 3    | LC+1                 | 284.2        | 0.73                                | 0.73          |
|      | <b>Total LC Area</b> | <b>391.6</b> |                                     |               |
| 4    | HC                   | 209.6        | 0.24                                | 0.00          |
| 5    | HC+1                 | 375.5        | 0.44                                | 0.44          |
| 6    | HC+2                 | 172          | 0.20                                | 0.40          |
| 7    | HC+3                 | 57.7         | 0.07                                | 0.20          |
| 8    | HC+4                 | 42.3         | 0.05                                | 0.20          |
|      | <b>Total HC Area</b> | <b>857.1</b> |                                     | <b>1.24</b>   |
|      |                      |              | <b>(LC+HC) Weighted Area</b>        | <b>1.96</b>   |
|      |                      |              | <b>DAR= 2*(LC+HC) Weighted Area</b> | <b>3.93</b>   |

c.

## Analytical HIC (FLD)

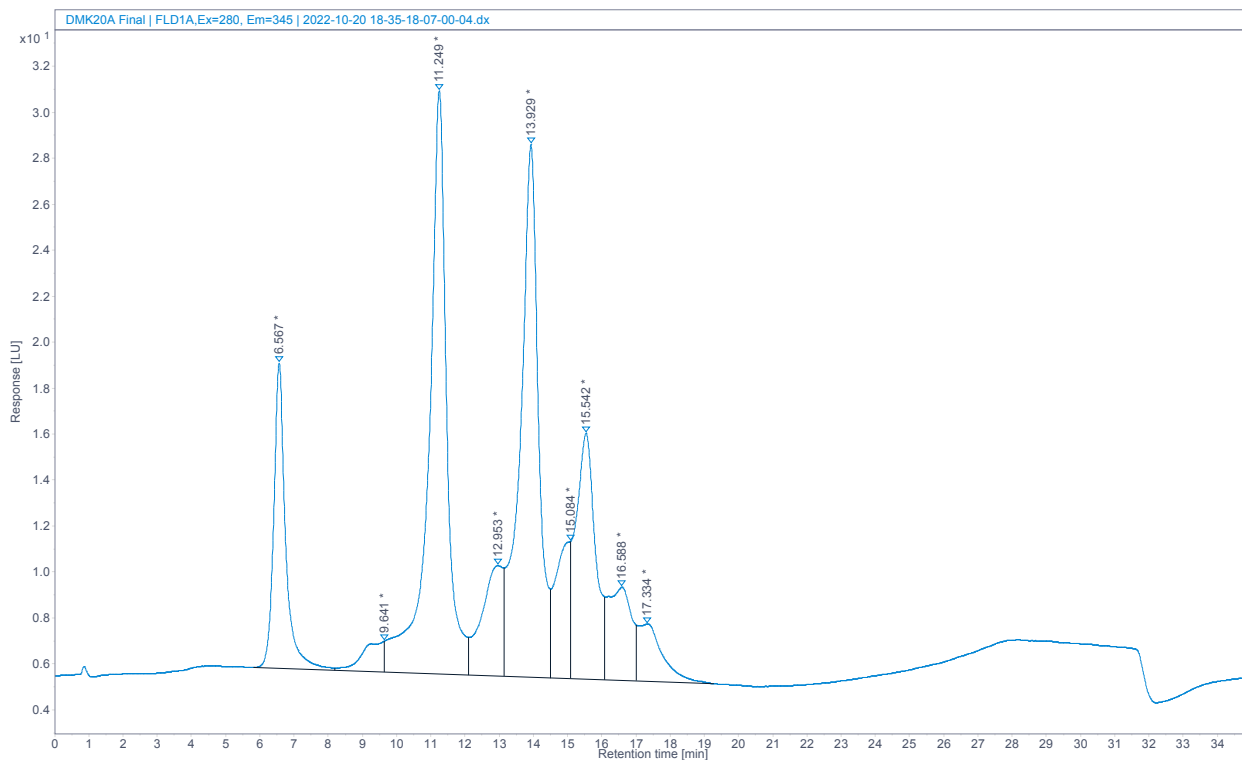

| # | DAR | Signal description   | RT (min) | Area (LU-s) | Area%  | Height (LU) | Height% | Start time (min) | End time (min)                    | Weighted Area (Area% * 0.01 * DAR) |
|---|-----|----------------------|----------|-------------|--------|-------------|---------|------------------|-----------------------------------|------------------------------------|
| 1 | 0   | FLD1A,Ex=280, Em=345 | 6.567    | 319.036     | 9.633  | 13.288      | 14.57   | 5.828            | 8.2                               | 0                                  |
| 2 | 1   | FLD1A,Ex=280, Em=345 | 9.641    | 58.233      | 1.758  | 1.347       | 1.48    | 8.2              | 9.646                             | 0.01758                            |
| 3 | 2   | FLD1A,Ex=280, Em=345 | 11.249   | 934.442     | 28.214 | 25.385      | 27.82   | 9.646            | 12.108                            | 0.56428                            |
| 4 | 3   | FLD1A,Ex=280, Em=345 | 12.953   | 210.097     | 6.343  | 4.801       | 5.26    | 12.108           | 13.147                            | 0.19029                            |
| 5 | 4   | FLD1A,Ex=280, Em=345 | 13.929   | 863.113     | 26.06  | 23.187      | 25.42   | 13.147           | 14.503                            | 1.0424                             |
| 6 | 5   | FLD1A,Ex=280, Em=345 | 15.084   | 179.591     | 5.422  | 5.975       | 6.55    | 14.503           | 15.09                             | 0.2711                             |
| 7 | 6   | FLD1A,Ex=280, Em=345 | 15.542   | 426.818     | 12.887 | 10.706      | 11.73   | 15.09            | 16.084                            | 0.77322                            |
| 8 | 8   | FLD1A,Ex=280, Em=345 | 16.588   | 194.97      | 5.887  | 4.055       | 4.44    | 16.084           | 17.01                             | 0.47096                            |
| 9 | 10  | FLD1A,Ex=280, Em=345 | 17.334   | 125.723     | 3.796  | 2.487       | 2.73    | 17.01            | 19.247                            | 0.3796                             |
|   |     |                      |          |             |        |             |         |                  | <b>DAR=Sum of Weighted % Area</b> | <b>3.71</b>                        |

d. **Analytical SEC (220 nM)**

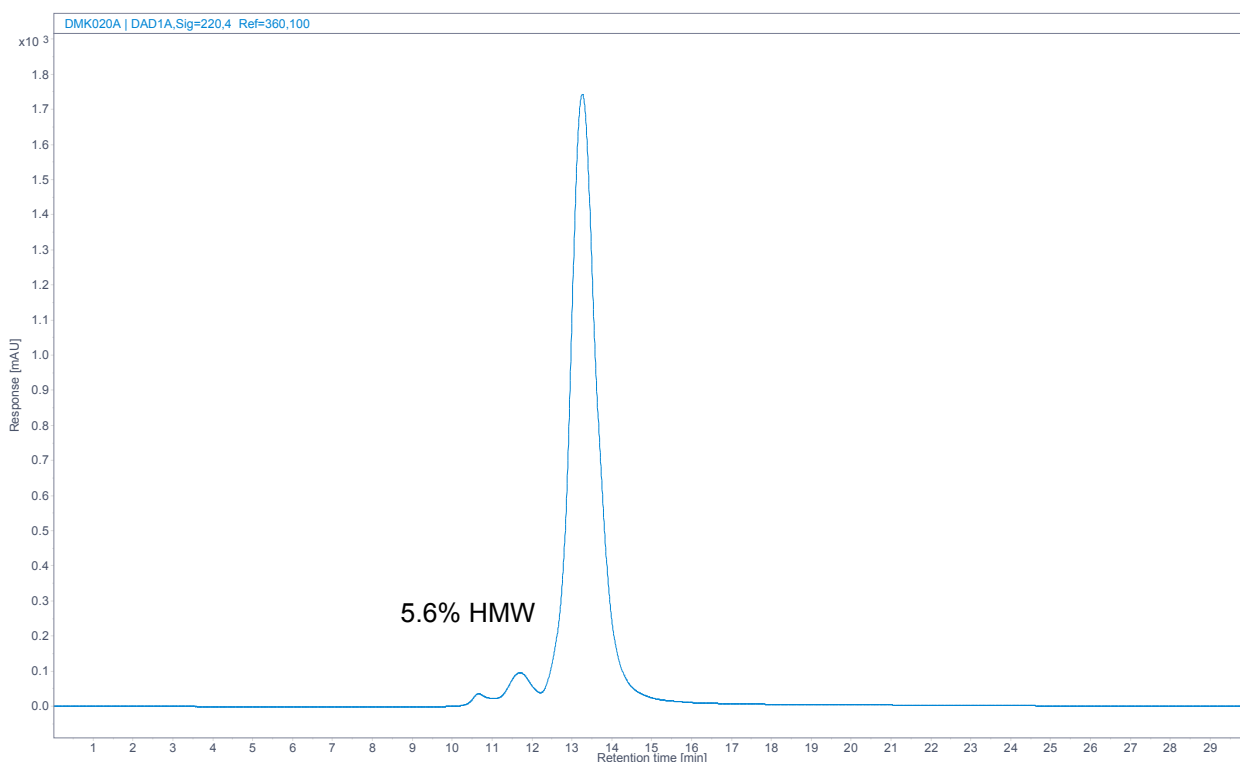

**Figure S8.** Characterization of  $\alpha$ mTfR1-MCC-pmoEx23 DAR4 AOC. (a) Lane view of reduced capillary gel electrophoresis and (b) electrophoretogram of reduced capillary gel electrophoresis with the weighted average calculating the average DAR to be 3.93 (c) weighted average calculations of the integrated AUC from Hydrophobic interaction chromatography showed the DAR to be 3.7 and (d) size exclusion chromatography for a  $\alpha$ mTfR1-MCC-pmoEx23 DAR4 AOC (partial TCEP reduction at 2.3 eq. TCEP, PMO:mAb equivalents 7). AOC, antibody–oligonucleotide conjugate; DAR, drug-to-antibody ratio; eq, equivalents; FLD, fluorescence detector; HIC, hydrophobic interaction chromatography; HMW, high molecular weight species; LU, luminescence units; MCC, 4-(N-maleimidomethyl) cyclohexane-1-carboxylate; mAU, milli-absorbance units; PMO, phosphorodiamidate morpholino oligomer; pmoEx23, PMO targeting mouse exon 23; SEC, size exclusion chromatography; TCEP, tris(2-carboxyethyl)phosphine.

a.

## Reduced capillary gel electrophoresis

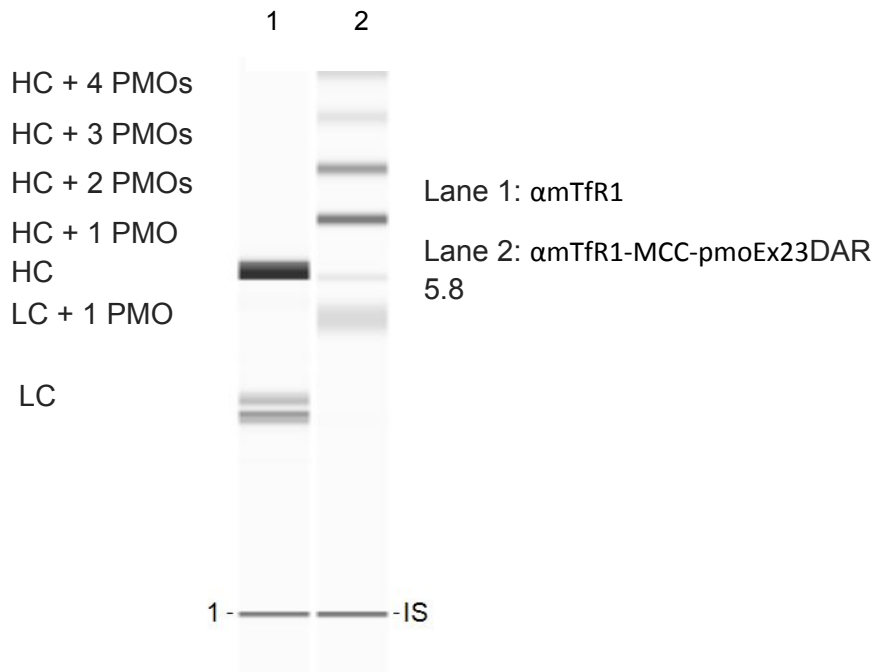

b.

## Reduced capillary gel electrophoresis

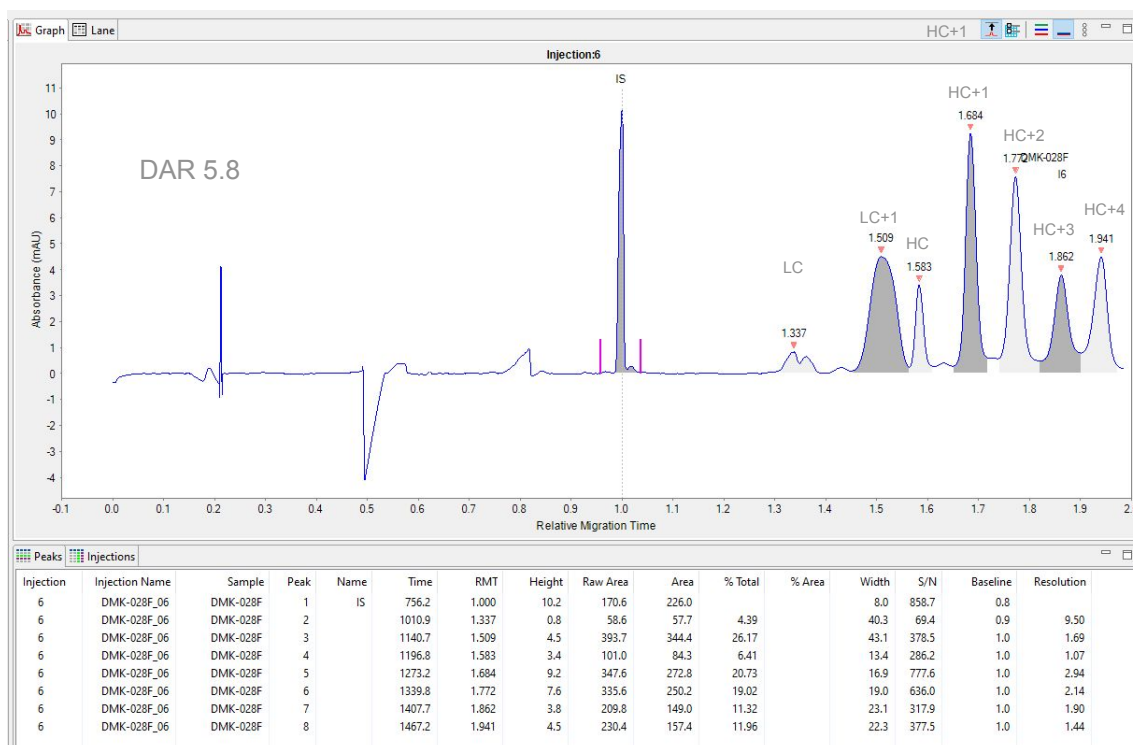

| Peak | Name                 | Area  | Area %                              | Weighted Area |
|------|----------------------|-------|-------------------------------------|---------------|
| 1    | IS                   | 226   |                                     |               |
| 2    | LC                   | 57.7  | 0.14                                | 0.00          |
| 3    | LC+1                 | 344.4 | 0.86                                | 0.86          |
|      | <b>Total LC Area</b> | 402.1 |                                     |               |
| 4    | HC                   | 84.3  | 0.09                                | 0.00          |
| 5    | HC+1                 | 272.8 | 0.30                                | 0.30          |
| 6    | HC+2                 | 250.2 | 0.27                                | 0.55          |
| 7    | HC+3                 | 149   | 0.16                                | 0.49          |
| 8    | HC+4                 | 157.4 | 0.17                                | 0.69          |
|      | <b>Total HC Area</b> | 913.7 |                                     | 2.02          |
|      |                      |       | <b>(LC+HC) Weighted Area</b>        | 2.88          |
|      |                      |       | <b>DAR= 2*(LC+HC) Weighted Area</b> | 5.76          |

### c. Analytical HIC (FLD)

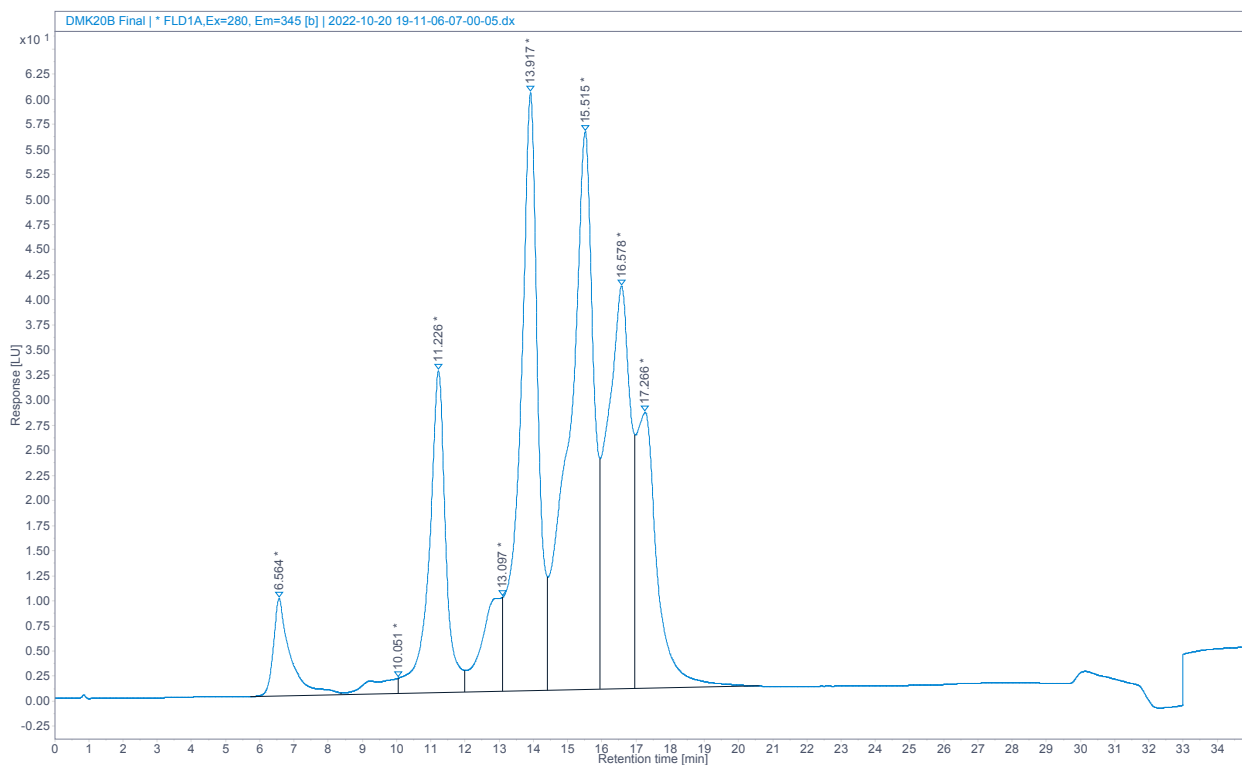

| # | DAR | Signal description         | RT (min) | Area (LU-s) | Area%  | Height (LU) | Height% | Start time (min) | End time (min)                    | Weighted Area (Area% *0.01*DAR) |
|---|-----|----------------------------|----------|-------------|--------|-------------|---------|------------------|-----------------------------------|---------------------------------|
| 8 | 10  | * FLD1A,Ex=280, Em=345 [b] | 17.266   | 1172.512    | 11.866 | 27.482      | 11.67   | 16.965           | 20.58                             | 1.1866                          |
| 7 | 8   | * FLD1A,Ex=280, Em=345 [b] | 16.578   | 1889.871    | 19.126 | 40.13       | 17.04   | 15.949           | 16.965                            | 1.53008                         |
| 6 | 6   | * FLD1A,Ex=280, Em=345 [b] | 15.515   | 2746.694    | 27.797 | 55.596      | 23.61   | 14.413           | 15.949                            | 1.66782                         |
| 5 | 4   | * FLD1A,Ex=280, Em=345 [b] | 13.917   | 2160.3      | 21.862 | 59.603      | 25.31   | 13.102           | 14.413                            | 0.87448                         |
| 4 | 3   | * FLD1A,Ex=280, Em=345 [b] | 13.097   | 389.065     | 3.937  | 9.374       | 3.98    | 11.995           | 13.102                            | 0.11811                         |
| 3 | 2   | * FLD1A,Ex=280, Em=345 [b] | 11.226   | 1095.516    | 11.087 | 32.062      | 13.62   | 10.053           | 11.995                            | 0.22174                         |
| 2 | 1   | * FLD1A,Ex=280, Em=345 [b] | 10.051   | 93.226      | 0.943  | 1.526       | 0.65    | 8.381            | 10.053                            | 0.00943                         |
| 1 | 0   | * FLD1A,Ex=280, Em=345 [b] | 6.564    | 334.197     | 3.382  | 9.673       | 4.11    | 5.738            | 8.381                             | 0                               |
|   |     |                            |          |             |        |             |         |                  | <b>DAR=Sum of Weighted % Area</b> | <b>5.61</b>                     |



#### d. Analytical SEC (220 nM)

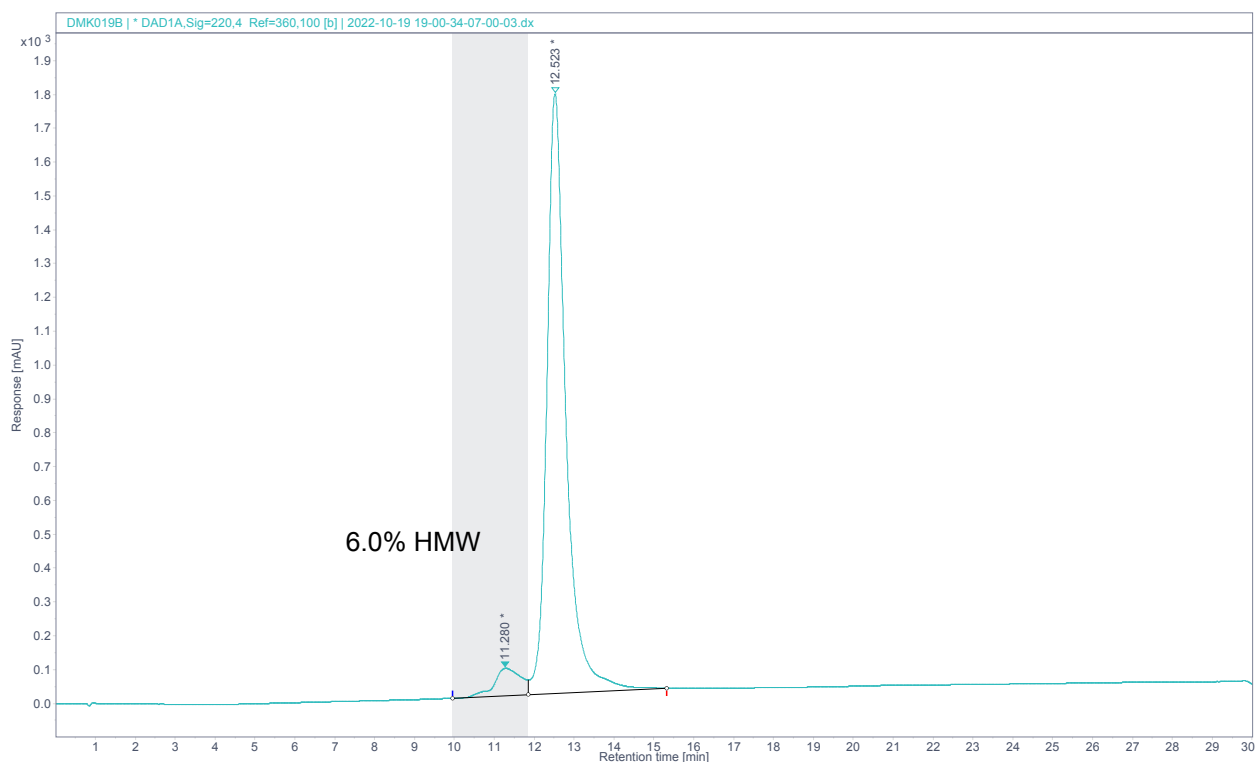

**Figure S9.** Characterization of  $\alpha$ mTfR1-MCC-pmoEx23 DAR6 AOC. (a) Lane view of reduced capillary gel electrophoresis and (b) electrophoretogram of reduced capillary gel electrophoresis with the weighted average calculating the average DAR to be 5.8 (c) weighted average calculations of the integrated AUC from Hydrophobic interaction chromatography showed the DAR to be 5.6 and (d) size exclusion chromatography for a  $\alpha$ mTfR1-MCC-pmoEx23 DAR6 AOC (partial TCEP reduction at 3.5 eq. TCEP, PMO:mAb equivalents 8.5). AOC, antibody–oligonucleotide conjugate; DAR, drug-to-antibody ratio; eq, equivalents; FLD, fluorescence detector; HIC, hydrophobic interaction chromatography; HMW, high molecular weight species; LU, luminescence units; MCC, 4-(N-maleimidomethyl) cyclohexane-1-carboxylate; mAU, milli-absorbance units; pmoEx23, PMO targeting mouse exon 23; SEC, size exclusion chromatography; TCEP, tris(2-carboxyethyl)phosphine.

a.

## Reduced capillary gel electrophoresis

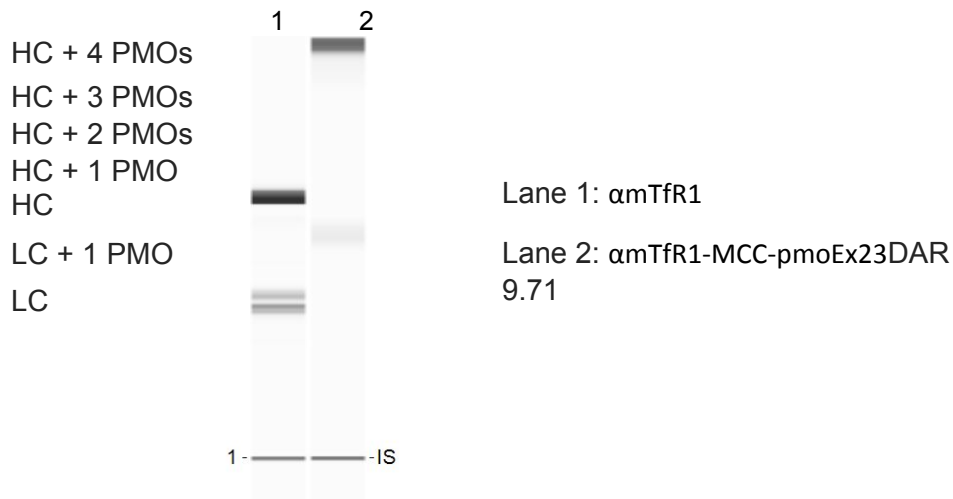

b.

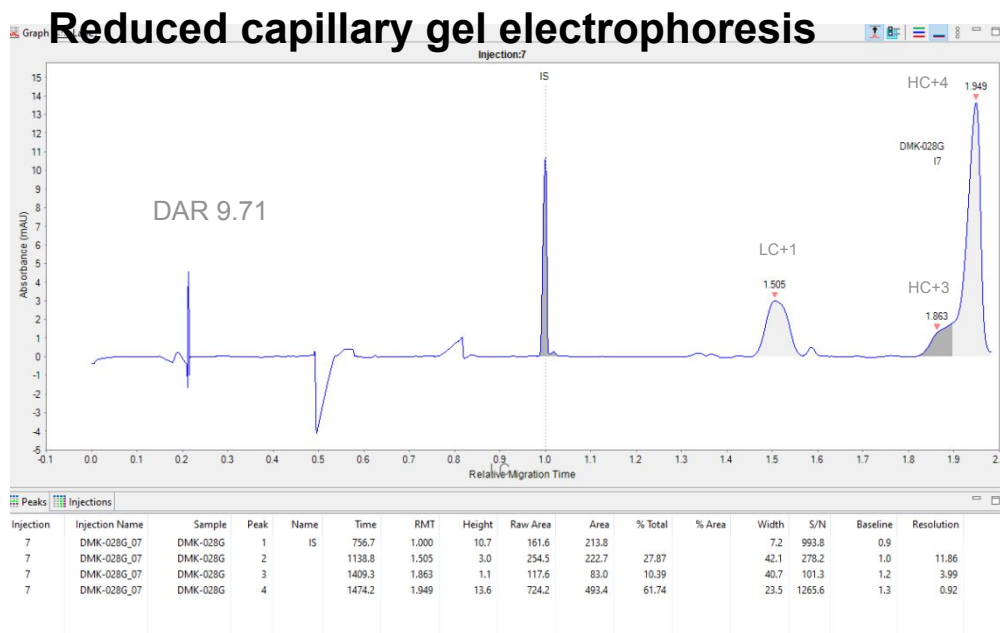

| Peak | Name                 | Area         | Area %                              | Weighted Area |
|------|----------------------|--------------|-------------------------------------|---------------|
| 1    | IS                   | 213.8        |                                     |               |
| 2    | LC                   | 0            | 0.00                                | 0.00          |
| 3    | LC+1                 | 222.7        | 1.00                                | 1.00          |
|      | <b>Total LC Area</b> | <b>222.7</b> |                                     |               |
| 4    | HC                   | 0            | 0.00                                | 0.00          |
| 5    | HC+1                 | 0            | 0.00                                | 0.00          |
| 6    | HC+2                 | 0            | 0.00                                | 0.00          |
| 7    | HC+3                 | 83           | 0.14                                | 0.43          |
| 8    | HC+4                 | 493.4        | 0.86                                | 3.42          |
|      | <b>Total HC Area</b> | <b>576.4</b> |                                     |               |
|      |                      |              | <b>(LC+HC) Weighted Area</b>        | <b>4.86</b>   |
|      |                      |              | <b>DAR= 2*(LC+HC) Weighted Area</b> | <b>9.71</b>   |

c.

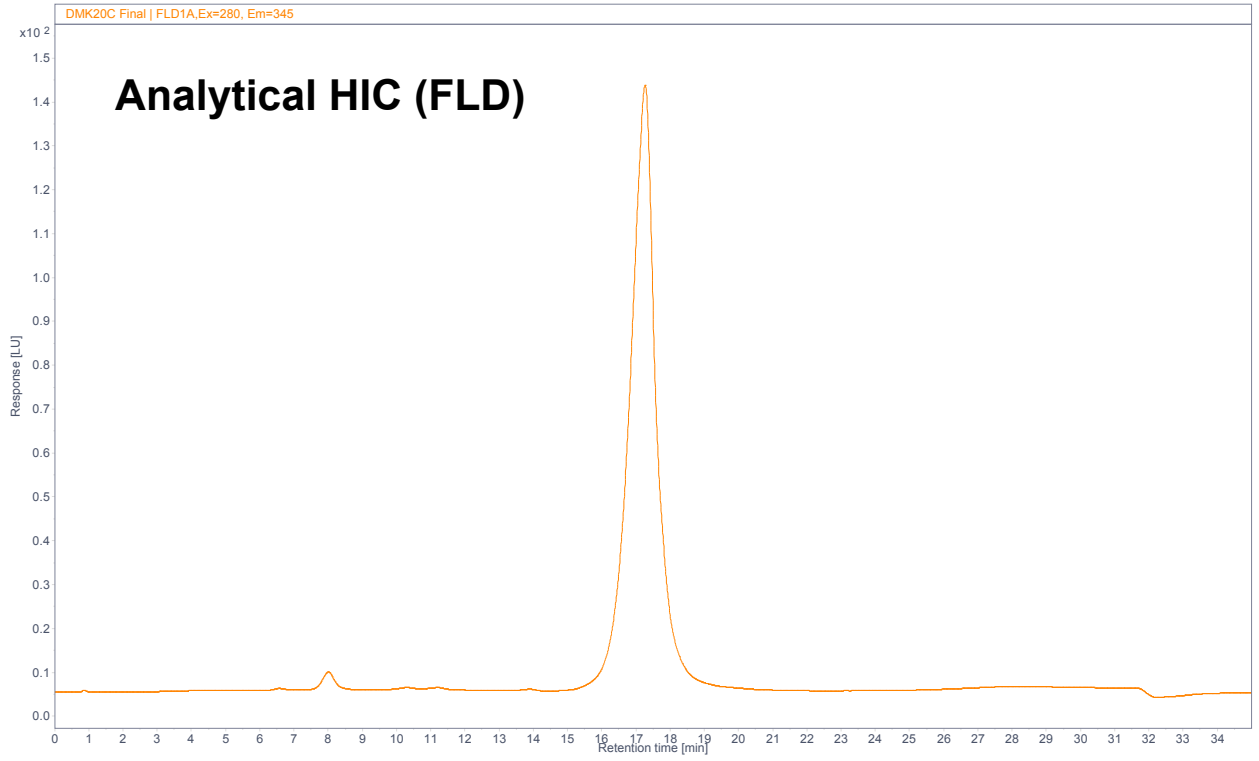

d.

### Analytical SEC (220 nM)

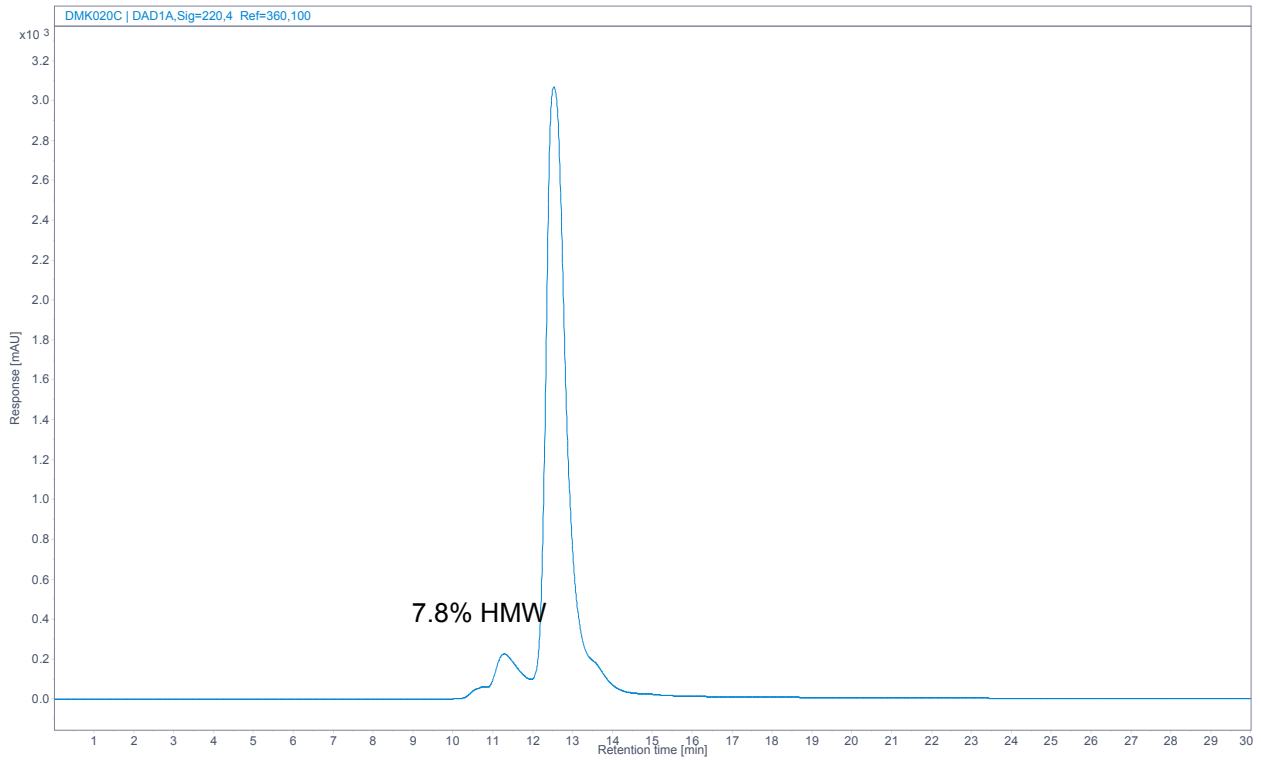

**Figure S10.** Characterization of  $\alpha$ mTfR1-MCC-pmoEx23 DAR10 AOC. (a) Lane view of reduced capillary gel electrophoresis and (b) electrophoretogram of reduced capillary gel electrophoresis with the weighted average calculating the average DAR to be 9.74 (c) Hydrophobic interaction chromatography showing the high DAR AOC appears as a single peak and (d) size exclusion chromatography for a  $\alpha$ mTfR1-MCC-pmoEx23 DAR10 AOC (partial TCEP reduction at 8 eq. TCEP, PMO:mAb equivalents 13.2). AOC, antibody–oligonucleotide conjugate; DAR, drug-to-antibody ratio; eq, equivalents; FLD, fluorescence detector; HIC, hydrophobic interaction chromatography; HMW, high molecular weight species; Ig, immunoglobulin; LU, luminescence units; MCC, 4-(N-maleimidomethyl) cyclohexane-1-carboxylate; mAU, milli-absorbance units; pmoEx23, PMO targeting mouse exon 23; TCEP, tris(2-carboxyethyl)phosphine.
